# Supplementary material for: Multisensor Satellite Data and Field Studies for Unravelling the Structural Evolution and Gold Metallogeny of the Gerf Ophiolitic Nappe, Eastern Desert, Egypt
Source: MDPI journal article supplement (doi:10.3390/rs15081974), 2023-04-08
Supplement: s1 [file s1]

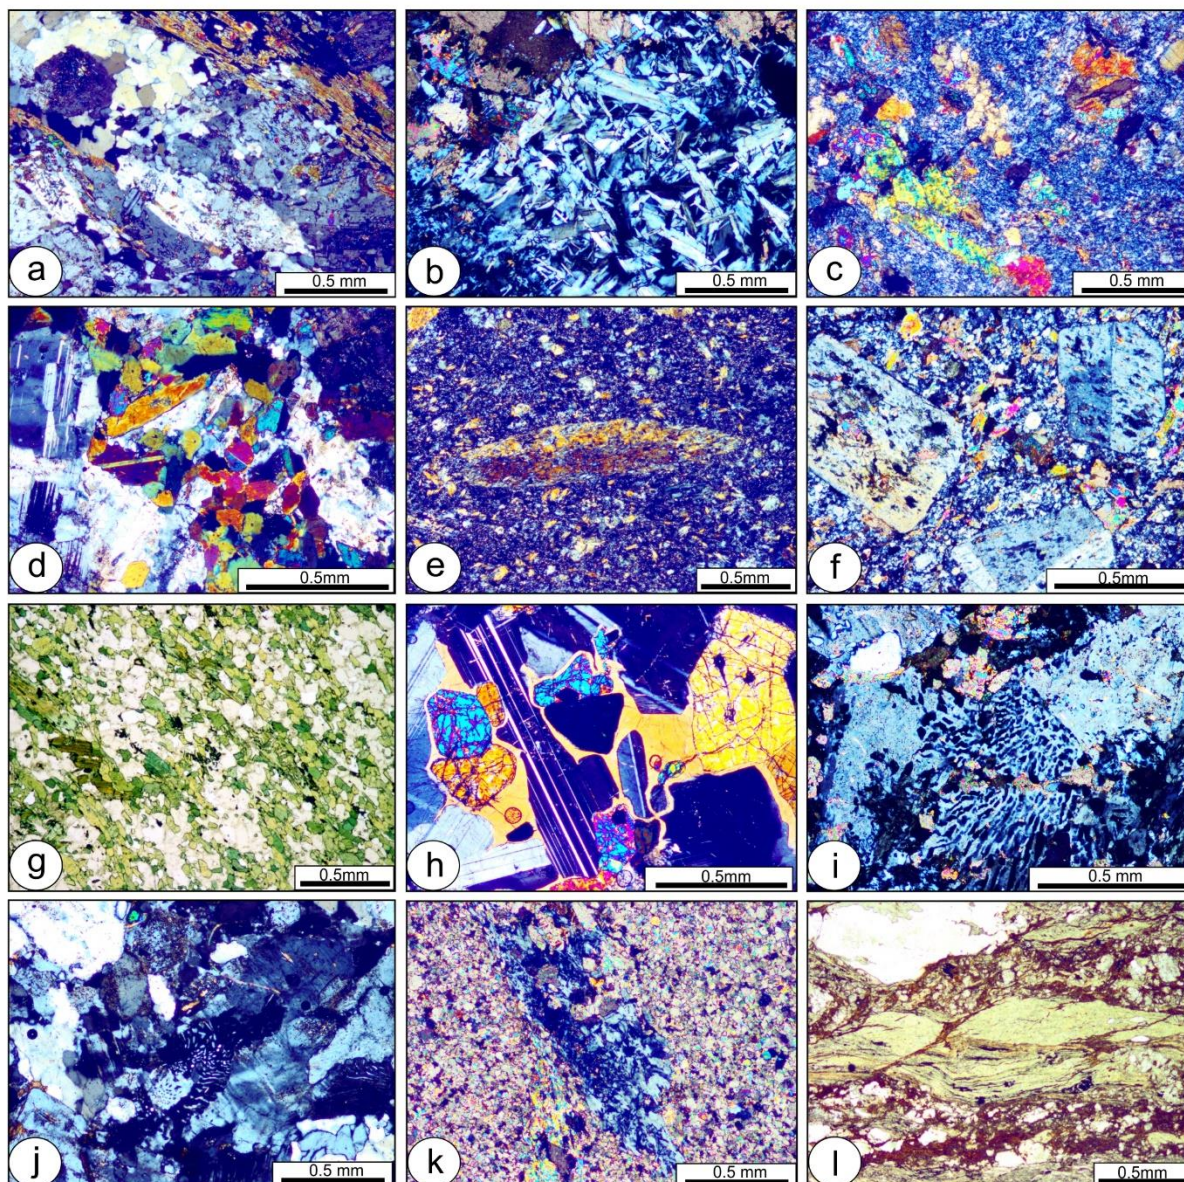

**Supplementary Figure S1.** Photomicrographs for some selected rocks from Gerf area; (a) Biotite gneiss consists of biotite, quartz and plagioclase, (b) Thin-section views of serpentine minerals and talc carbonates, (c) Serpentinized peridotite composed of serpentine minerals surrounding the orthopyroxene mineral, (d) Ophiolitic metagabbro composed of hornblende and plagioclase, (e) Altered plagioclase phenocryst in the metabasalt, (f) Euhedral plagioclase in the metaandesite, (g) Hornblende schist consists of hornblende, plagioclase and quartz formed, (h) olivine gabbro mainly composed of plagioclase, olivine and pyroxene forming typical ophitic texture, (i) Mozongranite composed mostly of quartz, alkali-feldspar and plagioclase, with subequal amounts of plagioclase and alkali-feldspar, (j) Syenogranite composed mostly of quartz and alkali-feldspar and plagioclase, with plagioclase usually less than alkali-feldspar, (k) Carbonate-chlorite-epidote schist from the alteration zones to the north of G. Gerf, (l) Mylonitic chlorite schist from the alteration zones to the north of G. Korbiai.

**Supplementary Table S1:** Summarized features of the PALSAR and Sentinel-1B datasets [30].

| Radar                             | PALSAR            |                         |                 |                        | Sentinel-1B (S1B)                     |                                 |                       |                 |
|-----------------------------------|-------------------|-------------------------|-----------------|------------------------|---------------------------------------|---------------------------------|-----------------------|-----------------|
| AM                                | Fine Resolution   | ScanSAR                 | Polarimetric    |                        | Strip map (SM)                        | Interferometric wide swath (IW) | Extra wide swath (EW) | Wave (WV)       |
| Beam Mode                         | FBS, DSN          | FBD                     | WB1, WB2        | PLR                    | S1 to S6                              | IW1 to IW3                      | EW1to EW5             | WV1&WV2         |
| Center Frequency                  | L-Band (1.27 GHz) |                         |                 |                        | C-band (5.405 GHz)                    |                                 |                       |                 |
| Polarization                      | SP (HH or VV)     | DP (HH + HV or VV + VH) | SP (HH or VV)   | DP (HH + HV + VV + VH) | SP (HH or VV)<br>DP (HH+HV and VV+VH) |                                 |                       | SP (HH or VV)   |
| Spatial Resolution                |                   |                         |                 |                        |                                       |                                 |                       |                 |
| For S1B: (range x azimuth), m x m | 10 m              | 20 m                    | 100 m           | 30 m                   | 5x5 m                                 | 5x20 m                          | 25x100 m              | 5x20 m          |
| Swath/band (S1B) Width Km         | 70 km             |                         | 250–350 km      | 30 km                  | 80 km                                 | 250 km                          | 4 km                  | 20x20 Km        |
| Off-Nadir Angle                   | 34.3° (default)   |                         | 27.1° (default) | 21.5° (default)        | -                                     | -                               | -                     | -               |
| Chirp Bandwidth [MHz]             | -                 | -                       | -               | -                      | 87.6-42.2 MHz                         | 56.5-42.8 MHz                   | 22.2-10.4 MHz         | 74.5 & 48.2 MHz |
| Incidence Angle (deg)             | -                 | -                       | -               | -                      | 20-43°                                | 30-42°                          | 20-44°                | 23 & 36.5°      |

Note: AM= Acquisition mode, DSN = Direct Downlink, FBD = Fine Resolution Mode, PLR = Polarimetry, HH, VV, HV, VH = Polarization types, Single Polarization= SP, Daul Polarization= DP, Degree=deg.
